# Supplementary material
Source: publisher figshare collection journal article supplement (https://sage.figshare.com/ndownloader/files/14221523)
Supplement: Supplementary file 1 [file 14221523]

**Supplementary Table 1: The minimum clinical differences that can be statistically significant**

| Procedures | A vs NC | B vs NC | C vs NC | A vs B | A vs C | B vs C |
| --- | --- | --- | --- | --- | --- | --- |
| Clinical difference (mm) | 2.85 | 3.18 | 3.27 | 2.58 | 2.67 | 3.00 |

The minimal real clinical difference that can yield statistically significant results with at least 0.8 power for a given number of boys included in the study and the value of the standard deviation of 3 mm (millimeters).
